# Supplementary material for: Population Genetic Analyses of Botrytis cinerea Isolates From Michigan Vineyards Using a High-Throughput Marker System Approach
Source: Front Microbiol. 2021 Apr 20;12:660874. doi: 10.3389/fmicb.2021.660874 (PMC8093758; doi:10.3389/fmicb.2021.660874)
Supplement: Supplementary file 3 [file Table_1.xlsx]

## Sheet: Supplemental Table 1
Iso	FastqReadName	LOC	YEAR	FLU	THIA	BOS	PYR	FEN	IPR	FLP	CYP	CULT	MFR			BC4	BC5	BC8	BC26	BC30	BC32	BC37	BC54	BC74
WestVignole1-18	ClarksvilleVignole1-18	West	2018	S	S	S	R	S	S	S	R	Vignoles	2		ClarksvilleVignole_1_18	215	243	140	139	75	NP	127	157	139
WestVignole1-14	ClarksvilleVignole1-14	West	2014	S	S	R	R	S	S	S	R	Vignoles	3		ClarksvilleVignole_1_14	205	243	140	152	75	265	127	123	135
WestVignole2-18	ClarksvilleVignole2-18	West	2018	S	S	R	R	S	S	S	R	Vignoles	3		ClarksvilleVignole_2_18	205	243	140	152	75	265	127	123	135
WestVignole2-14	ClarksvilleVignole2-14	West	2014	S	R	R	R	S	S	S	R	Vignoles	4		ClarksvilleVignole_2_14	184	243	134	139	90	NP	NP	123	151
WestVignole3-18	ClarksvilleVignole3-18	West	2018	S	S	R	R	S	S	S	R	Vignoles	3		ClarksvilleVignole_3_18	205	243	140	152	75	265	127	123	135
WestVignole3-14	ClarksvilleVignole3-14	West	2014	S	S	R	R	S	S	S	R	Vignoles	3		ClarksvilleVignole_3_14	205	243	140	152	75	265	127	123	135
WestVignole4-18	ClarksvilleVignole4-18	West	2018	S	R	R	R	S	S	R	R	Vignoles	5		ClarksvilleVignole_4_18	184	245	144	139	90	NP	NP	135	151
WestVignole5-18	ClarksvilleVignole5-18	West	2018	S	S	R	R	S	S	S	R	Vignoles	3			-	-	-	-	-	-	-	-	-
WestVignole6-18	ClarksvilleVignole6-18	West	2018	S	S	R	R	S	S	R	R	Vignoles	4		ClarksvilleVignole_6_18	215	243	140	139	75	265	127	157	139
WestVignole6-14	ClarksvilleVignole6-14	West	2014	S	R	R	R	S	S	S	R	Vignoles	4		ClarksvilleVignole_6_14	184	243	140	155	90	271	127	135	160
WestVignole7-18	ClarksvilleVignole7-18	West	2018	S	R	R	R	S	S	S	S	Vignoles	3		ClarksvilleVignole_7_18	184	243	140	148	70	271	127	135	151
WestVignole8-18	ClarksvilleVignole8-18	West	2018	S	R	R	R	S	S	S	S	Vignoles	3		ClarksvilleVignole_8_18	215	243	147	152	75	271	130	135	151
WestVignole9-18	ClarksvilleVignole9-18	West	2018	S	S	R	R	S	S	S	R	Vignoles	3		ClarksvilleVignole_9_18	215	243	140	139	75	265	127	157	139
WestVignole9-14	ClarksvilleVignole9-14	West	2014	S	S	R	R	S	S	S	R	Vignoles	3		ClarksvilleVignole_9_14	205	243	140	152	75	265	127	123	135
WestVignole10-18	ClarksvilleVignole10-18	West	2018	S	R	R	R	S	S	S	S	Vignoles	3		ClarksvilleVignole_10_18	184	243	140	145	66	271	133	135	151
WestVignole10-14	ClarksvilleVignole10-14	West	2014	S	R	R	R	S	S	S	R	Vignoles	4		ClarksvilleVignole_10_14	184	-	140	-	66	NP	-	135	160
WestVignole11-14	ClarksvilleVignole11-14	West	2014	S	S	R	R	S	S	S	R	Vignoles	3		ClarksvilleVignole_11_14	205	243	NP	152	75	265	127	123	135
WestVignole12-14	ClarksvilleVignole12-14	West	2014	S	R	R	R	S	R	S	S	Vignoles	4		ClarksvilleVignole_12_14	184	245	140	145	66	265	127	135	160
WestVignole14-14	ClarksvilleVignole14-14	West	2014	S	R	R	R	S	S	S	S	Vignoles	3		ClarksvilleVignole_14_14	180	243	147	145	75	271	130	135	160
WestVignole19-14	ClarksvilleVignole19-14	West	2014	S	R	R	R	S	S	S	S	Vignoles	3		ClarksvilleVignole_19_14	178	243	140	139	75	271	133	135	160
Southwest11-18	LemonCreek1-18	Southwest1	2018	S	S	S	R	S	S	S	R	Vignoles	2		LemonCreek_1_18	215	243	140	139	90	265	NP	157	139
Southwest12-18	LemonCreek2-18	Southwest1	2018	S	R	R	R	S	R	S	R	Vignoles	5		LemonCreek_2_18	184	243	140	152	-	-	133	135	-
Southwest13-18	LemonCreek3-18	Southwest1	2018	S	R	R	R	S	S	S	S	Vignoles	3		LemonCreek_3_18	184	243	140	142	66	271	124	135	160
Southwest13-14	LemonCreek3-14	Southwest1	2014	S	R	R	R	S	S	S	S	Vignoles	3		LemonCreek_3_14	184	243	140	155	66	271	127	135	160
Southwest14-18	LemonCreek4-18	Southwest1	2018	S	S	S	R	S	S	S	S	Vignoles	1		LemonCreek_4_18	215	243	140	139	75	265	127	157	139
Southwest15-18	LemonCreek5-18	Southwest1	2018	S	R	R	R	S	R	S	S	Vignoles	4		LemonCreek_5_18	180	243	147	145	75	265	130	135	160
Southwest15-14	LemonCreek5-14	Southwest1	2014	S	R	R	R	S	S	R	R	Vignoles	5		LemonCreek_5_14	180	243	147	145	66	265	130	135	160
Southwest16-18	LemonCreek6-18	Southwest1	2018	S	R	R	R	S	S	S	S	Vignoles	3		LemonCreek_6_18	184	243	140	148	70	271	127	135	143
Southwest16-14	LemonCreek6-14	Southwest1	2014	S	S	R	R	S	S	S	R	Vignoles	3		LemonCreek_6_14	205	243	140	152	75	265	127	123	127
Southwest17-18	LemonCreek7-18	Southwest1	2018	S	R	S	R	S	S	S	R	Vignoles	3		LemonCreek_7_18	215	243	140	139	90	NP	127	157	139
Southwest17-14	LemonCreek7-14	Southwest1	2014	S	R	R	R	R	S	S	R	Vignoles	5		LemonCreek_7_14	184	232	147	145	66	274	124	138	143
Southwest18-18	LemonCreek8-18	Southwest1	2018	S	R	R	R	S	R	S	S	Vignoles	4		LemonCreek_8_18	180	243	147	145	75	265	130	135	160
Southwest18-14	LemonCreek8-14	Southwest1	2014	S	R	R	R	R	S	S	R	Vignoles	5		LemonCreek_8_14	184	243	144	139	75	265	133	135	151
Southwest110-18	LemonCreek10-18	Southwest1	2018	S	R	R	R	S	S	S	S	Vignoles	3		LemonCreek_10_18	205	243	140	152	70	265	127	123	135
Southwest110-14	LemonCreek10-14	Southwest1	2014	S	S	R	R	S	S	S	R	Vignoles	3		LemonCreek_10_14	205	243	140	152	75	265	127	123	135
Southwest111-14	LemonCreek11-14	Southwest1	2014	S	R	R	R	S	R	S	R	Vignoles	5			-	-	-	-	-	-	-	-	-
Southwest113-14	LemonCreek13-14	Southwest1	2014	S	R	R	R	S	S	S	R	Vignoles	4		LemonCreek_13_14	-	243	134	-	-	-	-	NP	151
Southwest118-14	LemonCreek18-14	Southwest1	2014	S	R	R	R	R	S	S	R	Vignoles	5		LemonCreek_18_14	205	243	140	152	90	265	127	123	135
Southwest21-18	OxleyAurora1-18	Southwest2	2018	S	R	R	R	S	R	S	R	Aurora	5		OxleyAurora_1_18	190	243	140	142	66	283	124	123	139
Southwest21-14	OxleyAurora1-14	Southwest2	2014	S	R	R	R	S	R	S	R	Aurora	5		OxleyAurora_1_14	190	251	140	152	75	271	124	144	139
Southwest22-18	OxleyAurora2-18	Southwest2	2018	S	S	R	R	S	S	S	S	Aurora	2		OxleyAurora_2_18	190	235	140	145	75	283	127	123	135
Southwest22-14	OxleyAurora2-14	Southwest2	2014	S	R	R	R	S	R	S	S	Aurora	4		OxleyAurora_2_14	180	243	144	NP	90	283	NP	135	160
Southwest23-18	OxleyAurora3-18	Southwest2	2018	S	R	R	R	S	S	R	S	Aurora	4		OxleyAurora_3_18	NP	NP	140	NP	90	271	NP	135	135
Southwest23-14	OxleyAurora3-14	Southwest2	2014	S	S	S	S	S	S	S	S	Aurora	0		OxleyAurora_3_14	205	235	140	139	66	283	NP	123	139
Southwest24-18	OxleyAurora4-18	Southwest2	2018	S	S	R	R	S	S	S	R	Aurora	3			-	-	-	-	-	-	-	-	-
Southwest24-14	OxleyAurora4-14	Southwest2	2014	S	S	R	R	S	S	S	R	Aurora	3		OxleyAurora_4_14	205	243	140	152	75	265	127	123	135
Southwest25-18	OxleyAurora5-18	Southwest2	2018	S	S	R	R	S	S	S	S	Aurora	2		OxleyAurora_5_18	184	243	140	155	66	265	127	135	135
Southwest25-14	OxleyAurora5-14	Southwest2	2014	S	R	R	R	S	S	S	R	Aurora	4		OxleyAurora_5_14	184	243	140	155	66	271	127	135	160
Southwest26-18	OxleyAurora6-18	Southwest2	2018	S	R	R	R	S	S	S	S	Aurora	3		OxleyAurora_6_18	205	243	140	152	75	271	127	135	160
Southwest26-14	OxleyAurora6-14	Southwest2	2014	S	S	S	R	S	S	S	S	Aurora	1		OxleyAurora_6_14	190	245	140	139	66	271	124	135	160
Southwest27-18	OxleyAurora7-18	Southwest2	2018	S	S	R	R	S	S	S	S	Aurora	2		OxleyAurora_7_18	190	243	147	139	75	265	127	157	135
Southwest27-14	OxleyAurora7-14	Southwest2	2014	S	R	R	R	S	S	S	R	Aurora	4		OxleyAurora_7_14	215	243	140	155	66	265	127	135	160
Southwest28-18	OxleyAurora8-18	Southwest2	2018	S	S	R	R	S	S	S	S	Aurora	2		OxleyAurora_8_18	178	243	140	139	66	271	127	123	160
Southwest28-14	OxleyAurora8-14	Southwest2	2014	S	S	R	S	S	S	R	S	Aurora	2		OxleyAurora_8_14	190	235	140	142	75	265	103	123	135
Southwest29-18	OxleyAurora9-18	Southwest2	2018	S	R	R	R	S	S	S	S	Aurora	3		OxleyAurora_9_18	184	243	140	155	75	283	127	135	139
Southwest210-18	OxleyAurora10-18	Southwest2	2018	S	R	R	R	S	S	S	S	Aurora	3		OxleyAurora_10_18	178	243	140	139	66	271	127	123	139
Southwest210-14	OxleyAurora10-14	Southwest2	2014	S	S	S	R	S	S	S	S	Aurora	1		OxleyAurora_10_14	190	243	140	139	75	NP	127	123	139
Southwest211-14	OxleyAurora11-14	Southwest2	2014	S	S	R	R	S	S	S	R	Aurora	3		OxleyAurora_11_14	205	-	140	-	87	265	-	123	-
Southwest215-14	OxleyAurora15-14	Southwest2	2014	S	R	R	R	S	S	S	R	Aurora	4		OxleyAurora_15_14	NP	243	134	139	66	265	124	123	151
Southwest217-14	OxleyAurora17-14	Southwest2	2014	S	R	R	R	S	R	S	S	Aurora	4		OxleyAurora_17_14	184	243	144	139	66	265	106	135	127
Southwest220-14	OxleyAurora20-14	Southwest2	2014	S	R	R	R	S	S	S	S	Aurora	3		OxleyAurora_20_14	180	243	140	145	90	NP	NP	135	151
Southwest221-14	OxleyAurora21-14	Southwest2	2014	S	R	R	R	S	S	S	R	Aurora	4		OxleyAurora_21_14	NP	243	147	145	90	NP	127	157	135
Southwest227-14	OxleyAurora27-14	Southwest2	2014	S	R	R	R	S	R	S	S	Aurora	4		OxleyAurora_27_14	184	243	144	139	66	265	106	135	127
Northwest1-18	ShadyLane1-18	Northwest	2018	S	R	R	R	S	S	R	R	Riesling	5		ShadyLane_1_18	180	243	147	145	70	NP	130	-	160
Northwest1-14	ShadyLane1-14	Northwest	2014	S	R	R	R	S	S	S	R	Riesling	4		ShadyLane_1_14	215	243	147	145	75	265	127	157	135
Northwest2-18	ShadyLane2-18	Northwest	2018	S	R	R	R	R	R	R	R	Riesling	7		ShadyLane_2_18	169	243	140	139	70	NP	124	138	160
Northwest2-14	ShadyLane2-14	Northwest	2014	S	S	R	R	S	S	S	R	Riesling	3		ShadyLane_2_14	205	243	140	152	75	265	127	123	135
Northwest3-18	ShadyLane3-18	Northwest	2018	S	R	R	R	S	S	R	R	Riesling	5		ShadyLane_3_18	178	243	140	145	70	NP	133	135	160
Northwest3-14	ShadyLane3-14	Northwest	2014	S	S	R	R	S	S	S	R	Riesling	3		ShadyLane_3_14	205	243	140	152	75	265	127	123	135
Northwest4-18	ShadyLane4-18	Northwest	2018	S	R	R	R	S	R	R	R	Riesling	6			-	-	-	-	-	-	-	-	-
Northwest5-18	ShadyLane5-18	Northwest	2018	S	R	R	R	S	S	R	R	Riesling	5		ShadyLane_5_18	180	243	147	145	93	NP	130	135	160
Northwest5-14	ShadyLane5-14	Northwest	2014	S	S	R	R	S	S	S	R	Riesling	3		ShadyLane_5_14	205	243	140	152	75	265	127	123	135
Northwest6-18	ShadyLane6-18	Northwest	2018	S	R	R	R	S	S	R	R	Riesling	5		ShadyLane_6_18	184	245	140	145	93	NP	133	135	160
Northwest7-18	ShadyLane7-18	Northwest	2018	S	R	R	R	S	S	R	R	Riesling	5		ShadyLane_7_18	178	243	140	145	93	NP	NP	135	160
Northwest7-14	ShadyLane7-14	Northwest	2014	S	R	R	R	S	R	S	R	Riesling	5		ShadyLane_7_14	178	243	144	145	66	271	106	135	160
Northwest8-18	ShadyLane8-18	Northwest	2018	S	R	R	R	S	S	R	R	Riesling	5		ShadyLane_8_18	178	243	140	-	70	NP	133	135	-
Northwest8-14	ShadyLane8-14	Northwest	2014	S	R	R	R	S	S	S	R	Riesling	4			-	-	-	-	-	-	-	-	-
Northwest9-18	ShadyLane9-18	Northwest	2018	S	R	R	R	R	S	S	R	Riesling	5			-	-	-	-	-	-	-	-	-
Northwest10-18	ShadyLane10-18	Northwest	2018	S	R	R	R	S	R	R	R	Riesling	6		ShadyLane_10_18	184	243	147	145	66	271	130	135	160
Northwest11-14	ShadyLane11-14	Northwest	2014	S	R	R	R	S	S	S	R	Riesling	4		ShadyLane_11_14	180	-	NP	NP	-	NP	133	-	151
Northwest12-14	ShadyLane12-14	Northwest	2014	S	R	R	R	S	R	S	R	Riesling	5		ShadyLane_12_14	184	243	140	152	66	265	133	135	151

## Sheet: Supplemental Table 2
Primer	GeneName	Forward Primer	Reverse Primer	Anneal Temp	Purpose	Chromosome	bp	Reference
HMG3	MAT1-2 HMG	TGGAACTCCAGAACGTCAAA	GCCGTTCATCATTCTTCGTT	60	Mating type	ch2	255	Wessels et al. 2013
HMG2	MAT1-2 HMG	TCGATACGACTCCTGTGGAA	GATCGGTGTGTTGCCTACAA	59	Mating type	ch2	254	Wessels et al. 2013
NEPO5	NEP1	CAGATTTCCCCAAGGATCAA	CAAATCTCTGCCCAAGGTGT	60	Virulence	ch6	257	Staats et al. 2007
Bc3		GGATGAATCAGTTGTTTGTG	CACCTAGGTATTTCCTGGTA	50	Microsatellite	ch1	197-229	Fournier et al. 2002
N_Bc_pop22	BC1G_00215	ACACAGCACACCATAGCACA	TGAAGAATGTTTTCCGCGCC	60	Microsatellite	ch1	180
N_Bc_pop72	BC1G_00283	CAATGCGGTTGATACAGGCG	GAGTTCCGGTGAAGCTGTCA	60	Microsatellite	ch1	208
N_Bc_pop90	BC1G_00324	CCGTGTGTCCAAGGTATGCT	TTGGGCGTCAATTGCAAAGG	60	Microsatellite	ch1	231
alpha1	MAT1-1 α	ATGACGGCTCCCTTCAAAAC	TGCGGTTTGTCTCTCATTCA	61	Mating type	ch1	210	Wessels et al. 2013
Flip3	Flipper	CTCAGCTACGGGAAGAGCAC	TTGCTTCTTTCGGTCGAGTT	60	TE	ch1	206	Levis et al. 1997
N_Bc_pop17	BC1G_15884	ACCCAAACCCAACCCCAAAT	TATCATCCGCGTGGTCTTCG	60	Microsatellite	ch10	152
N_Bc_pop53	BC1G_03602	GCTCCTCACGTGTTGACTGA	TGGATGGGTGGATGGTTTCG	60	Microsatellite	ch10	175
N_Bc_pop78	BC1G_13432	CATCACTCCACTGCCAGTGT	GTAGGGTGTTGGAGAGGTGC	60	Microsatellite	ch10	271
N_Bc_pop81	BC1G_05124	GAACGTCACGATACGCAAGC	TCTGACTCGGTGAGGGAGAG	60	Microsatellite	ch10	147
N_Bc_pop48	BC1G_04625	TCAGCGCAAATTGTGAACCG	GACCTGTGATGTGATGCCCA	60	Microsatellite	ch11	119
N_Bc_pop89	BC1G_13854	GCGCCGTAACCGTAACAATC	CCGCCCCTTTAATGGTCACT	60	Microsatellite	ch12	200
MS5	MS547	GGTATGCGAAACCGTGAAAT	GTCGATAGATGGGCTGCAAG	60	B.cinerea Vs Pesudocinerea	ch12	233	Walker et al. 2011
N_Bc_pop16	BC1G_04929	CCTACACCTGCACCGACATT	CGTCTACCTCCGCATCCTTC	60	Microsatellite	ch13	256
N_Bc_pop35	BC1G_06422	GGTTCAGGCACAAGCACAAG	GAACAAGGGAGGGAAGCGAA	60	Microsatellite	ch13	269
N_Bc_pop63	BC1G_14377	GCAGCAACAACAAGAGGGTG	TTGTGGTTCTGCTCGGACTC	60	Microsatellite	ch13	226
N_Bc_pop36	BC1G_11998	CCGTTAGTGTGCGAGAACCT	TTTCCCCGACGGCTAGTAGA	60	Microsatellite	ch14	242
N_Bc_pop38	BC1G_11999	ACCACATTCGCAGAGAGAGC	TTTGGCTTTGCTCTGGGACA	60	Microsatellite	ch14	140
RPB1	RPB2	ATTTCGGAAAGAAGCGTTTG	CGGTAGAACTTGCTGCCTTC	60	Species Identification	ch14	231	Staats et al. 2005
N_Bc_pop34	BC1G_11591	GGAAGGGAGGAAATGGACGG	TCCTTCCGCCATTCTTTCCC	60	Microsatellite	ch15	273
N_Bc_pop57	BC1G_13682	GACCTCGCTCTACTCGCTTC	CACACCAGGCGTCAAACTTG	60	Microsatellite	ch15	125
G3P4	G3PDH	CTCTCGCCAAGGTCATCAAC	GAGACGTTGGCAGTTGGAA	60	Species Identification	ch15	263	Staats et al. 2005
N_Bc_pop85	BC1G_08081	CCCCTCACACTCACACTCAC	CCTTGTGGAGGGGGATTTCC	60	Microsatellite	ch2	135
N_Bc_pop12	BC1G_11679	TTAGGCAAGTCACTGGGCAG	TCGTCGTGCTCTCGTTTTCA	60	Microsatellite	ch3	116	Staats et al. 2007
N_Bc_pop62	BC1G_06127	TCCGGAAACTGACGAATGGG	CGCGGCTCTCGAAAAGATTG	60	Microsatellite	ch3	101
N_Bc_pop79	BC1G_06541	AGATAACCTTGGCGACGTGG	TCCGCATTTTCTTCCCTCTCT	60	Microsatellite	ch3	101
Bchch2	Bc-hch	CGCTAATGCGGAAATTAACAT	GCTTCCCATGCCAGGAAT	61	Group II Vs Group I	ch3	271	Fournier et al. 2003
N_Bc_pop13	BC1G_04200	AGCACAAATCACAGCTCGGA	TCGTCACTCCATTTTCCGCA	60	Microsatellite	ch4	114
N_Bc_pop29	BC1G_10612	GACTGAACAGCTGAACGGGA	GCTGCCCGACTTCTTCTTCT	60	Microsatellite	ch4	114
N_Bc_pop87	BC1G_03782	TTTGGGGATGAGGAACGAGC	TCGGTCTCTCCCATTCTCGT	60	Microsatellite	ch4	113
N_Bc_pop55	BC1G_01555	GGCCAGAGTCTTCGAACACA	GCGATCTAGTTTTGGCAGCG	60	Microsatellite	ch5	233
N_Bc_pop24	BC1G_05702	GCATCGGAATCGTCGGGTAT	GCATCACCTTACAACCCCGA	60	Microsatellite	ch6	164
N_Bc_pop31	BC1G_05733	ACCATTCAAGCCTCCCGAAG	GTTATCGAGAGCGGGTCTGG	60	Microsatellite	ch6	111
Bc9		CTCGTCATAACCACGCAGAT	GCAAGGTCTCGATGTCGATC	50	Microsatellite	ch7 / chr2	150-194	Fournier et al. 2002
N_Bc_pop42	BC1G_02801	TGGAGATGACCCATCGGCTA	TGGACCGGTGTGGGTATTTG	60	Microsatellite	ch7	217
HSP5	HSP60	TCGCACAAGTTGCGACTATC	TCTCAGAAAGGAGAATCAATGG	59	Species Identification	ch7	243	Staats et al. 2005
Bc8		ACTAGATTCGAGATTCAGTT	AAGGTGGTATGAGCGGTTTA	50	Microsatellite	ch8	88-158	Fournier et al. 2002
N_Bc_pop20	BC1G_07837	CATAGCACTTGAGCCAGGCT	TGACAGCCGAGAAAGACCAC	60	Microsatellite	ch8	197
N_Bc_pop50	BC1G_14573	GTGAGGTGAGGTGAGGTGTG	GTAGGAAGCAGCAAGGGGTT	60	Microsatellite	ch8	170
N_Bc_pop52	BC1G_07540	CCCGTCTATTTCAAGGCCGT	ATCGCCGTCTTGTACATCCC	60	Microsatellite	ch8	241
N_Bc_pop14	BC1G_12133	CAACAGCAACCGCAATCACA	ATTTGTCCGTTAGGCTGGGG	60	Microsatellite	ch9	251
N_Bc_pop19	BC1G_12993	GGCAATGGGGGTGGTTATGA	TGAGTTGAGCCCGAAGTTCC	60	Microsatellite	ch9	164
N_Bc_pop71	BC1G_07681	CCCCCAAAACACCATTGCTG	ACAAAGGTTCGATACGGCGT	60	Microsatellite	ch9	176
N_Bc_pop59	BC1G_01708	CACAGCCGATGTAGCAGCTA	GAGAGGTAAGGGGTCCGTCT	60	Microsatellite	ch5	126
N_Bc_pop82	BC1G_12477	GTGCGAAGGCTAGCTACGAT	CGCAGTTTGCACGGTAAACA	60	Microsatellite	ch5	193
mrr3	mrr1	CAACATAAACGACGAGGATATGA	ACCACCACAATCTTGGATCA	59	B.cinerea Vs Group S	ch5	257/254	Leroch et al. 2013
Cytochrome b	Cytochrome b	CTGGGTCACTAATGGGTGTCTG	TTGTCCAATTCATGGTACAGCA	62	Species Identification	mitochondrial	249
Erg27	Erg27	TGCCCTTGAATTTCGTGTTG	ACGCGTTCTTTCCCACTAGC	62	Species Identification	12	182
sdhB	sdhB	CATATCTTCAACACACCGACCC	TGCCAAACCAGGATTCAATCCC	62	Species Identification	mitochondrial	320
tubA	tubA	GCCTCGTTATCGATACAGAAGATC	TATGATGGCTACCTTCTCCGTC	62	Species Identification	12	132

## Sheet: Supplemental Table 3
ISO	Number of reads R1	GC content	Overrepresented	Reads Mapped
ClarksvilleVignole1-18	27057	46	8.26	96.95
ClarksvilleVignole1-14	28797	46	10.7	95.86
ClarksvilleVignole2-18	24392	46	7.5	96.62
ClarksvilleVignole2-14	30117	45	8.5	97.06
ClarksvilleVignole3-18	22166	46	8.1	96.5
ClarksvilleVignole3-14	27807	46	8.7	97.02
ClarksvilleVignole4-18	19549	46	7.6	96.66
ClarksvilleVignole5-18	19766	46	10.5	96.44
ClarksvilleVignole6-18	23374	46	11.1	97.14
ClarksvilleVignole6-14	25477	46	8.3	96.12
ClarksvilleVignole7-18	19910	46	10.2	96.55
ClarksvilleVignole8-18	29221	46	8.7	97.35
ClarksvilleVignole9-18	28187	46	8.13	97.13
ClarksvilleVignole9-14	22852	45	13	95.52
ClarksvilleVignole10-18	24729	46	8.4	96.63
ClarksvilleVignole10-14	20174	46	8.2	96.42
ClarksvilleVignole11-14	19094	46	9.3	96.96
ClarksvilleVignole12-14	20003	45	11	97.03
ClarksvilleVignole14-14	24244	46	9.8	96.65
ClarksvilleVignole19-14	28424	46	8.22	97.36
LemonCreek1-18	21754	46	8.9	96.72
LemonCreek2-18	16762	46	8.1	96.28
LemonCreek3-18	22297	46	10.4	97.64
LemonCreek3-14	23251	46	9.5	97.43
LemonCreek4-18	19434	46	7.9	96.78
LemonCreek5-18	25916	46	7.7	97.17
LemonCreek5-14	19869	46	8.2	96.93
LemonCreek6-18	26363	46	8.4	97.53
LemonCreek6-14	27757	46	10.5	97.73
LemonCreek7-18	19015	46	8.6	96.61
LemonCreek7-14	28923	46	9.5	98.02
LemonCreek8-18	19044	46	8.4	95.94
LemonCreek8-14	29156	46	8.5	97.97
LemonCreek10-18	16311	46	8.5	95.39
LemonCreek10-14	21973	45	7.5	95.17
LemonCreek11-14	21658	46	7.8	97.47
LemonCreek13-14	21135	46	8.6	97.21
LemonCreek18-14	15332	45	10.1	95.94
OxleyAurora1-18	20879	47	8.5	97.86
OxleyAurora1-14	22703	46	9.1	95.73
OxleyAurora2-18	18002	46	8.4	97.07
OxleyAurora2-14	20464	46	6.9	96.64
OxleyAurora3-18	18576	46	8.9	97.46
OxleyAurora3-14	18859	46	9.1	98.35
OxleyAurora4-18	27050	46	6.9	96.74
OxleyAurora4-14	20525	46	9.6	97.93
OxleyAurora5-18	26262	46	9.7	97.69
OxleyAurora5-14	24871	46	10.1	97.76
OxleyAurora6-18	28596	46	7.9	96.41
OxleyAurora6-14	28985	46	8.5	97.75
OxleyAurora7-18	29151	46	7.2	97.16
OxleyAurora7-14	28331	46	8.2	97.86
OxleyAurora8-18	29076	46	7.4	97.36
OxleyAurora8-14	24424	46	8	97.73
OxleyAurora9-18	29733	46	7.2	97.76
OxleyAurora10-18	23785	46	7.4	97.14
OxleyAurora10-14	21266	46	7.1	97.17
OxleyAurora11-14	20711	46	8.1	97.64
OxleyAurora15-14	14897	46	9.5	97.02
OxleyAurora17-14	21857	46	11.5	97.71
OxleyAurora20-14	21721	46	9.4	97.88
OxleyAurora21-14	20060	45	17.3	95.38
OxleyAurora27-14	23469	46	10.2	97.47
ShadyLane1-18	22561	47	9.4	99.92
ShadyLane1-14	28913	46	9.1	97.32
ShadyLane2-18	27997	46	7.8	97.3
ShadyLane2-14	32110	46	7.7	97.56
ShadyLane3-18	27613	46	8	96.45
ShadyLane3-14	32740	46	8.2	97.68
ShadyLane4-18	26641	46	7.5	96.63
ShadyLane5-18	25836	46	7.5	96.44
ShadyLane5-14	27986	46	8.4	97.23
ShadyLane6-18	31842	46	7.2	96.78
ShadyLane7-18	21452	46	7	96.36
ShadyLane7-14	24933	45	8	97.29
ShadyLane8-18	19799	46	7.9	96.25
ShadyLane8-14	23390	46	8	97.45
ShadyLane9-18	18857	45	8.9	96.28
ShadyLane10-18	28752	46	10.2	97.48
ShadyLane11-14	20866	46	9.4	96.61
ShadyLane12-14	23508	46	10.3	96.55
